# Supplementary material for: Insights into Singapore’s National Strategy for Primary Care Reform: Physician Attitudes, Facilitators and Barriers to Healthier SG
Source: Research Square preprint supplement (doi:10.21203/rs.3.rs-5908939/v1), 2025-01-30
Supplement: Supplementary file 1 [file 2d58565643109c9ed5038586.docx]

**Interview Guide**

**[(1)Verbal consent + (2)assurance of anonymity at the start of every Interview]**

**Section 1: Introduction and Background**

1. **Please describe you work experience and the profile of the typical patient pool you care for.**
   - To check: Rank, years of experience, private or public, rough location
   - To check: Patient profile (age range, complexity, socio-economic status)
2. **Based on your current understanding, what is HealthierSG (HSG), its objectives and the support system within the programme?**
   - Note: To check for misconceptions or knowledge level of HSG.
3. **Describe your extent of participation in HSG.**
   - Does HSG have an impact on your daily work?
   - Possible prompts:
     1. Approximately how many enrolled residents do you have?
     2. How actively do you follow up with your residents?
     3. To what extent do you interact with PCN systems/cluster support/community partners (AACs)?
4. **Prior to HSG, describe the extent to which you participated in government-related initiative or funding (e.g. CHAS, PCN system, PHPC).**

**Section 2: Attitudes towards Healthier SG**

1. **What are your overall thoughts on the Healthier SG initiative?**
   - Any perceived benefits?
   - Any disagreements, concerns or reservations about HSG?
2. **How do you feel HSG aligns with your approach to patient care?**
   - Does the HSG model complement how you currently approach patient care? If no, then how does HSG differ?
3. **What aspects of HSG do you find most promising or beneficial?**
   - Specific programs or strategies?
   - Expected outcomes and experience for patients?
   - Expected experience for providers?

**Section 3: Implementation and Experience**

1. **How has the implementation of HSG impacted your practice?**
   - Any changes in workflow or procedures before, during, or after a consult?
   - How does it affect your interaction with patients?
2. **Have you encountered any challenges or barriers while implementing HSG?**
   - Specific examples (without identifiers) should be encouraged
   - What are the frequency and impact of these challenges raised?
3. **How has the support and communication from public and private healthcare institutions been during the rollout of HSG?**
   - Is there adequate resources and support?
4. **How has the collaboration and communication between you and Ministry of Health, cluster regional health office, Agency for Integrated Care (AIC), or any relevant authorities been?**

**Section 4: Suggestions and Future Directions**

1. **In your opinion, what are the critical factors for the success of HSG?**
   - What are the key drivers and enablers?
   - What might cause the HSG to fail if done/not done? Or what are potential challenges ahead?
2. **What suggestions do you have for improving the implementation of HSG?**
   - Changes in policy or strategy?
   - Additional resources or support needed?
3. **How do you envision the future of HSG in your practice?**
   - Is this model sustainable in the long run? Expect differing responses from public vs private family physicians.
   - Do you forsee the role of primary care providers evolving?
4. **Is there anything else you would like to share about your experience with HSG?**
   - Additional comments or insights
